# Supplementary material for: Zn(ii), Cd(ii) and Hg(ii) saccharinate complexes with 2,6-bis(2-benzimidazolyl)pyridine as promising anticancer agents in breast and lung cancer cell linesviaROS-induced apoptosis
Source: Royal Society of Chemistry journal article supplement (doi:10.1039/d0dt01535k), 2020-01-01
Supplement: d0dt01535k1.pdf [file d0dt01535k1.pdf]

## Electronic Supplementary Information (ESI)

### **Zn(II), Cd(II) and Hg(II) saccharinate complexes with 2,6-bis(2-benzimidazolyl)pyridine as promising anticancer agents in breast and lung cancer cell lines via ROS-induced apoptosis**

Ceyda Icel, <sup>a</sup> Veysel T. Yilmaz, <sup>\*a</sup> Seyma Aydinlik <sup>b</sup> and Muhittin Aygun <sup>c</sup>

<sup>a</sup>Department of Chemistry, Faculty of Arts and Sciences, Uludag University, 16059 Bursa, Turkey.

<sup>b</sup>TUBITAK Marmara Research Center, Genetic Engineering and Biotechnology Institute, 41470 Gebze, Kocaeli, Turkey

<sup>c</sup>Department of Physics, Faculty of Sciences, Dokuz Eylul University, 35210 Izmir, Turkey

Corresponding Author:

Prof. Dr. Veysel T. Yilmaz  
Department of Chemistry  
Faculty of Arts and Sciences  
Bursa Uludag University  
16059 Bursa, Turkey

E-mail: vtyilmaz@uludag.edu.tr

**Table S1** Crystallographic data and structure refinement for the metal complexes.

|                                                | <b>Zn</b>                                                                        | <b>Cd</b>                                                                      | <b>Hg</b>                                                                      |
|------------------------------------------------|----------------------------------------------------------------------------------|--------------------------------------------------------------------------------|--------------------------------------------------------------------------------|
| empirical formula                              | C <sub>52</sub> H <sub>38</sub> N <sub>12</sub> O <sub>8</sub> S <sub>2</sub> Zn | C <sub>33</sub> H <sub>21</sub> CdN <sub>7</sub> O <sub>6</sub> S <sub>2</sub> | C <sub>33</sub> H <sub>21</sub> HgN <sub>7</sub> O <sub>6</sub> S <sub>2</sub> |
| formula weight                                 | 1088.43                                                                          | 788.09                                                                         | 876.28                                                                         |
| crystal system                                 | triclinic                                                                        | monoclinic                                                                     | monoclinic                                                                     |
| space group                                    | <i>P</i> $\bar{1}$                                                               | <i>I</i> 2/ <i>a</i>                                                           | <i>I</i> 2/ <i>a</i>                                                           |
| <i>a</i> , Å                                   | 10.1938(5)                                                                       | 10.1600(7)                                                                     | 10.2014(6)                                                                     |
| <i>b</i> , Å                                   | 12.5434(9)                                                                       | 14.1135(9)                                                                     | 14.2651(7)                                                                     |
| <i>c</i> , Å                                   | 19.5581(14)                                                                      | 21.9573(14)                                                                    | 21.9691(12)                                                                    |
| $\alpha$ , deg                                 | 88.570(6)                                                                        | 90                                                                             | 90                                                                             |
| $\beta$ , deg                                  | 82.144(5)                                                                        | 97.560(6)                                                                      | 97.393(6)                                                                      |
| $\gamma$ , deg                                 | 76.167(5)                                                                        | 90                                                                             | 90                                                                             |
| <i>V</i> , Å <sup>3</sup>                      | 2405.4(3)                                                                        | 3121.2(4)                                                                      | 3170.5(3)                                                                      |
| <i>T</i> , K                                   | 150(10)                                                                          | 293(2)                                                                         | 293(2)                                                                         |
| <i>Z</i>                                       | 2                                                                                | 4                                                                              | 4                                                                              |
| $\rho_{\text{calc}}$ (g cm <sup>-3</sup> )     | 1.503                                                                            | 1.677                                                                          | 1.836                                                                          |
| $\mu$ (mm <sup>-1</sup> )                      | 0.669                                                                            | 0.893                                                                          | 5.045                                                                          |
| <i>F</i> (000)                                 | 1120                                                                             | 1584                                                                           | 1712                                                                           |
| $\theta$ (°)                                   | 3.042-25.681                                                                     | 2.946-25.678                                                                   | 3.148-25.676                                                                   |
| collected refls                                | 13899                                                                            | 5916                                                                           | 5075                                                                           |
| data/ parameters                               | 9069 /692                                                                        | 2968/227                                                                       | 3001/223                                                                       |
| goodness-of-fit                                | 1.011                                                                            | 1.074                                                                          | 1.031                                                                          |
| <i>R</i> <sub>1</sub> [ <i>I</i> >2 $\sigma$ ] | 0.0472                                                                           | 0.0349                                                                         | 0.0337                                                                         |
| <i>wR</i> <sub>2</sub>                         | 0.1000                                                                           | 0.0702                                                                         | 0.0686                                                                         |

**Table S2** Selected bond lengths (Å) and angles (°) for the metal complexes.

|                        | <b>Zn</b> | <b>Cd</b>  | <b>Hg</b>  |
|------------------------|-----------|------------|------------|
| M1–N1                  | 2.208(2)  | 2.359(4)   | 2.420(5)   |
| M1–N2                  | 2.139(2)  | 2.390(2)   | 2.437(3)   |
| M1–N3                  | 2.146(2)  | -          | -          |
| M1–N4                  | -         | 2.222(3)   | 2.215(4)   |
| M1–N6                  | 2.151(3)  | -          | -          |
| M1–N7                  | 2.136(2)  | -          | -          |
| M1–N8                  | 2.181(3)  | -          | -          |
| N1–M1–N2               | 74.01(8)  | 69.16(6)   | 68.02(9)   |
| N1–M1–N3               | 149.08(9) | -          | -          |
| N1–M1–N4               | -         | 117.01(8)  | 118.69(11) |
| N2–M1–N4               | -         | 104.39(9)  | 104.34(14) |
| N2–M1–N2 <sup>i</sup>  | -         | 138.32(13) | 136.04(18) |
| N2–M1–N4 <sup>i</sup>  | -         | 94.28(9)   | 96.41(13)  |
| N4–Cd1–N4 <sup>i</sup> | -         | 125.97(15) | 122.6(2)   |
| N1–M1–N6               | 96.67(9)  | -          | -          |
| N1–M1–N7               | 93.66(8)  | -          | -          |
| N1–M1–N8               | 89.12(9)  | -          | -          |
| N2–M1–N3               | 75.16(8)  | -          | -          |
| N2–M1–N6               | 114.40(9) | -          | -          |
| N2–M1–N7               | 164.78(9) | -          | -          |
| N2–M1–N8               | 95.91(9)  | -          | -          |
| N3–Zn1–N6              | 93.85(9)  | -          | -          |
| N3–Zn1–N7              | 117.16(8) | -          | -          |
| N3–Zn1–N8              | 96.31(9)  | -          | -          |
| N6–Zn1–N7              | 75.24(9)  | -          | -          |
| N6–Zn1–N8              | 149.59(9) | -          | -          |
| N7–Zn1–N8              | 74.61(9)  | -          | -          |

Symmetry code (i):  $-x+1/2, y, -z+1$ .

**Table S3** Intermolecular interactions of the metal complexes with DNA obtained from molecular docking models.

|            | (D–H)                                 | Hydrogen bonds<br>(H...A) | (H...A, Å) | Binding free energy<br>(kJ mol <sup>-1</sup> ) |
|------------|---------------------------------------|---------------------------|------------|------------------------------------------------|
| PDB : 1BNA |                                       |                           |            |                                                |
| <b>Zn</b>  | bzimpy-N5H                            | DA5:OP2                   | 2.42       | –34.73                                         |
|            | bzimpy-N10H                           | DT19:O4                   | 2.51       |                                                |
|            | DG4: OP2 <i>electrostatic</i>         | $\pi$ (bzimpy)            | 3.69       |                                                |
| <b>Cd</b>  | DG4:H21                               | O2-sac (sulfonyl)         | 2.03       | –37.66                                         |
|            | DC23:H4'                              | O1-sac (carbonyl)         | 2.37       |                                                |
|            | sac (sulfonyl-S) <i>electrostatic</i> | DA6: OP1                  | 3.81       |                                                |
| <b>Hg</b>  | DG4:H21                               | O3-sac (sulfonyl)         | 1.97       | –38.49                                         |
|            | DC23:H4'                              | O1-sac (carbonyl)         | 2.36       |                                                |
|            | DA5:H5'2                              | O2-sac (sulfonyl)         | 2.53       |                                                |
|            | sac (sulfonyl-S) <i>electrostatic</i> | DA6: OP1                  | 3.84       |                                                |
| PDB : 3CO3 |                                       |                           |            |                                                |
| <b>Zn</b>  | bzimpy-N10H                           | DG21:O6                   | 2.12       | –33.89                                         |
|            | bzimpy-N4H                            | DC2:OP2                   | 2.61       |                                                |
|            | DA20: OP2 <i>electrostatic</i>        | $\pi$ (bzimpy)            | 3.89       |                                                |
| <b>Cd</b>  | DC11:H5'1                             | O2-sac (sulfonyl)         | 2.10       | –37.24                                         |
|            | DA17:H4'                              | O2-sac (sulfonyl)         | 2.59       |                                                |
|            | bzimpy-N3H                            | DT10:O2                   | 2.65       |                                                |
|            | bzimpy-N3H                            | DC12:O5'                  | 2.88       |                                                |
|            | DC12:OP1 <i>electrostatic</i>         | $\pi$ (bzimpy)            | 3.32       |                                                |
|            | sac (sulfonyl-S) <i>electrostatic</i> | DC12: OP1                 | 3.84       |                                                |
|            | DA17:OP1 <i>electrostatic</i>         | $\pi$ (sac)               | 3.88       |                                                |
| <b>Hg</b>  | DG16:H21                              | O3-sac (sulfonyl)         | 2.19       | –38.07                                         |
|            | DC11:H5'1                             | O1-sac (carbonyl)         | 2.43       |                                                |
|            | DC11:H5'2                             | O2-sac (sulfonyl)         | 2.64       |                                                |
|            | DC12:OP1 <i>electrostatic</i>         | $\pi$ (sac)               | 3.64       |                                                |
|            | sac (sulfonyl-S) <i>electrostatic</i> | DC12:OP1                  | 3.96       |                                                |
| PDB : 1LU5 |                                       |                           |            |                                                |
| <b>Zn</b>  | bzimpy-N10H                           | DG6:OP2                   | 2.01       | –37.66                                         |
|            | bzimpy-N4H                            | DA15:N7                   | 2.50       |                                                |
|            | DA15: OP2 <i>electrostatic</i>        | $\pi$ (bzimpy)            | 3.35       |                                                |
|            | DT5: OP2 <i>electrostatic</i>         | $\pi$ (bzimpy)            | 3.66       |                                                |
| <b>Cd</b>  | DG16:H21                              | O2-sac (sulfonyl)         | 2.28       | –37.24                                         |
|            | DA17:H5'2                             | O3-sac (sulfonyl)         | 2.71       |                                                |
|            | DA17:H5'2                             | O1-sac (carbonyl)         | 2.75       |                                                |
| <b>Hg</b>  | DG16:H21                              | O3-sac (sulfonyl)         | 2.06       | –38.49                                         |
|            | DC11:H4'1                             | O3-sac (sulfonyl)         | 2.58       |                                                |
|            | DT10:H1'                              | O3-sac (sulfonyl)         | 2.80       |                                                |
|            | DT10:H1'                              | O2-sac (sulfonyl)         | 2.84       |                                                |
|            | DC11:OP1 <i>electrostatic</i>         | $\pi$ (sac)               | 3.92       |                                                |

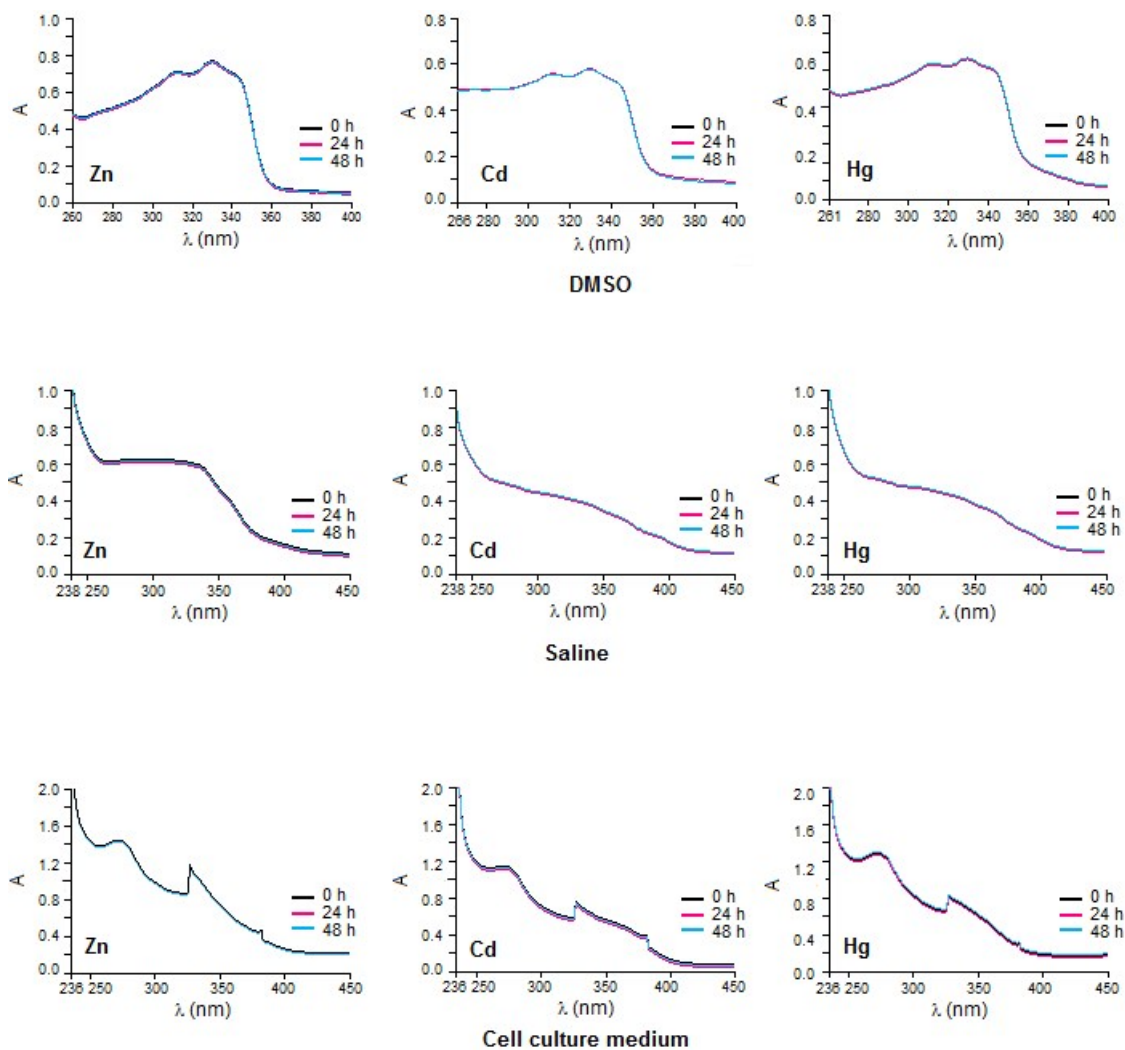

**Fig. S1** UV-Vis spectra of the metal complexes (10  $\mu$ M) showing their time-dependent stability in DMSO, saline and cell culture medium.

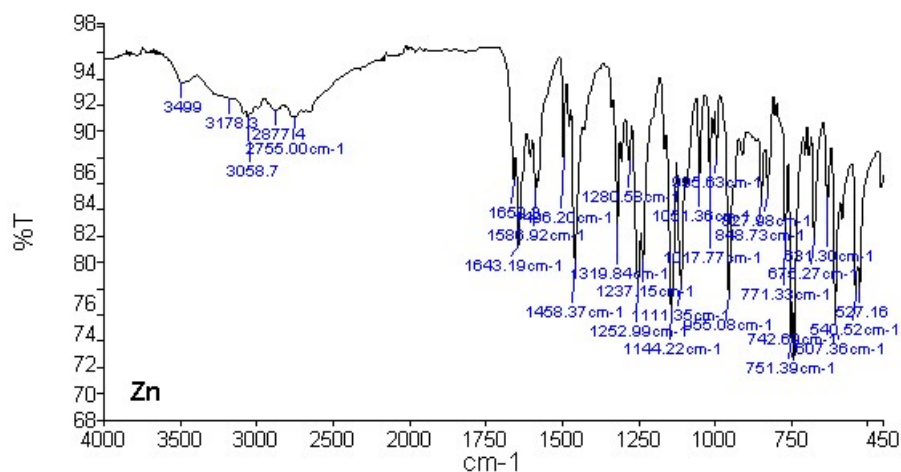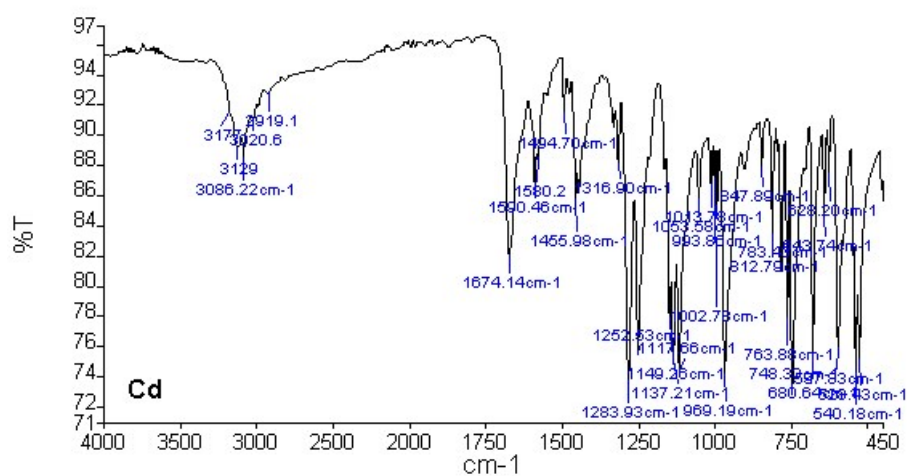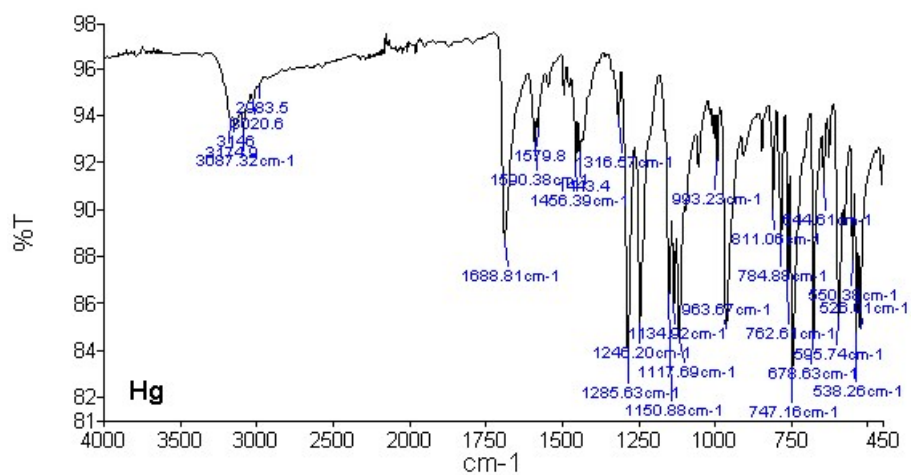

**Fig. S2** IR spectra of the metal complexes.

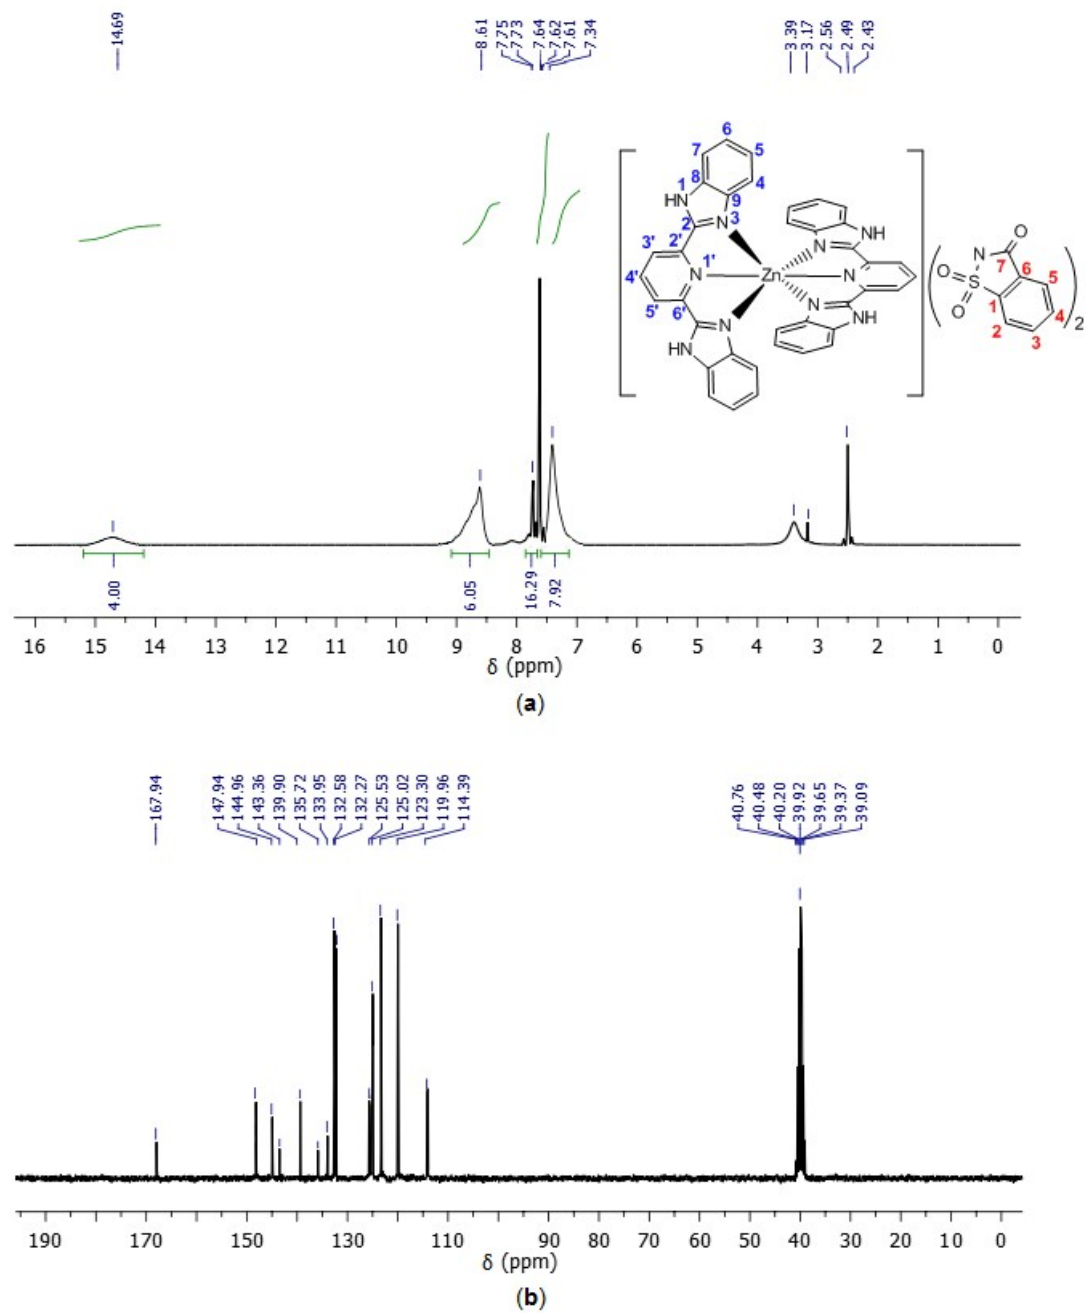

Fig. S3a  $^1\text{H}$ - (a) and  $^{13}\text{C}$ - (b) spectra of Zn.

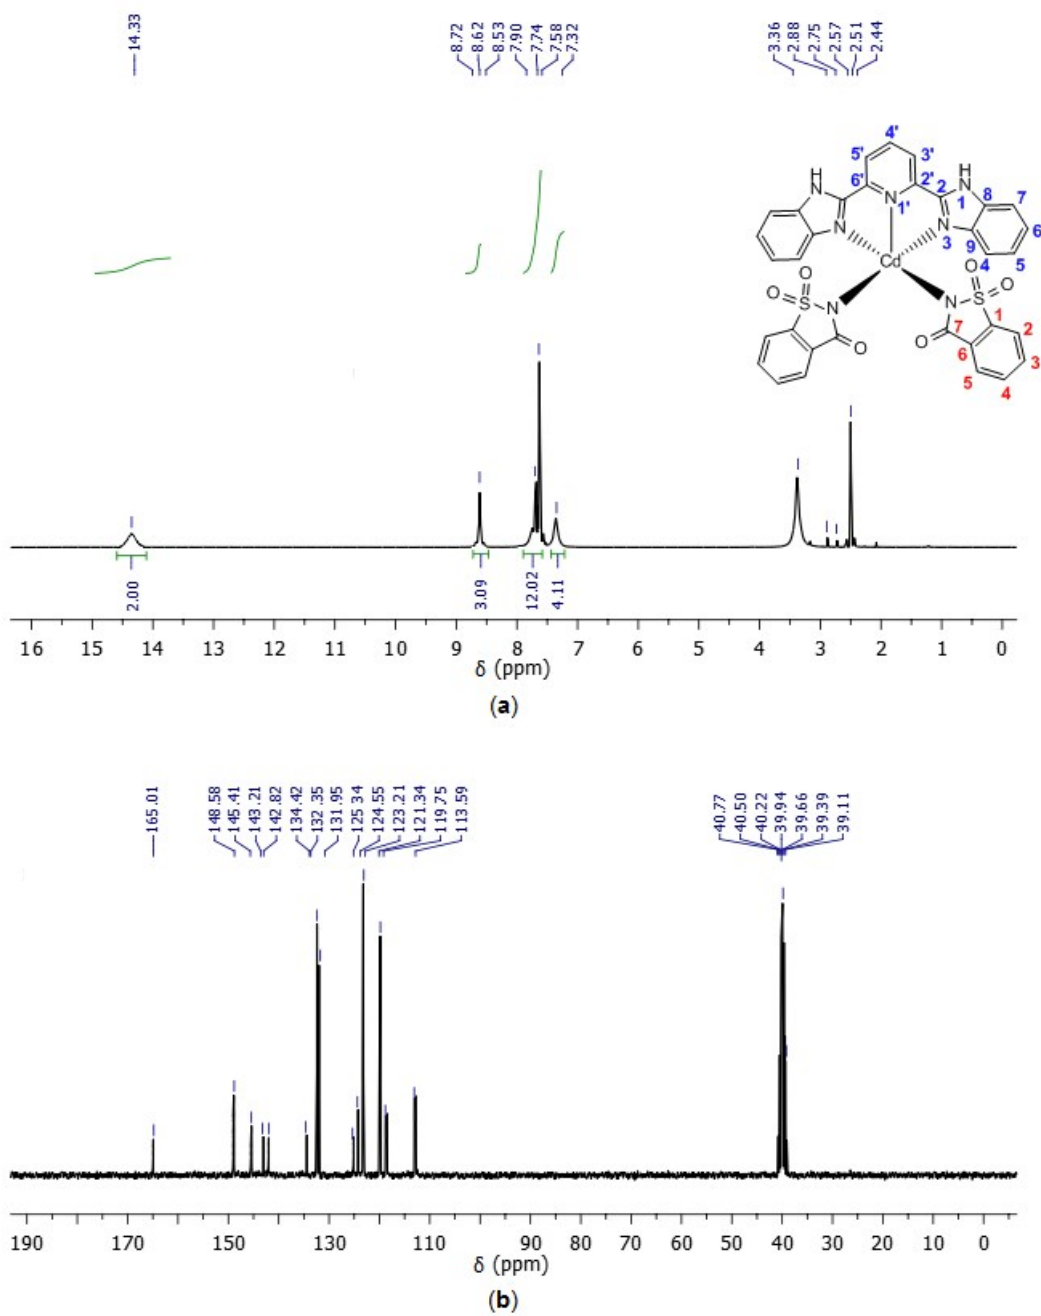

**Fig. S3b**  $^1\text{H}$ - (a) and  $^{13}\text{C}$ - (b) spectra of Cd.



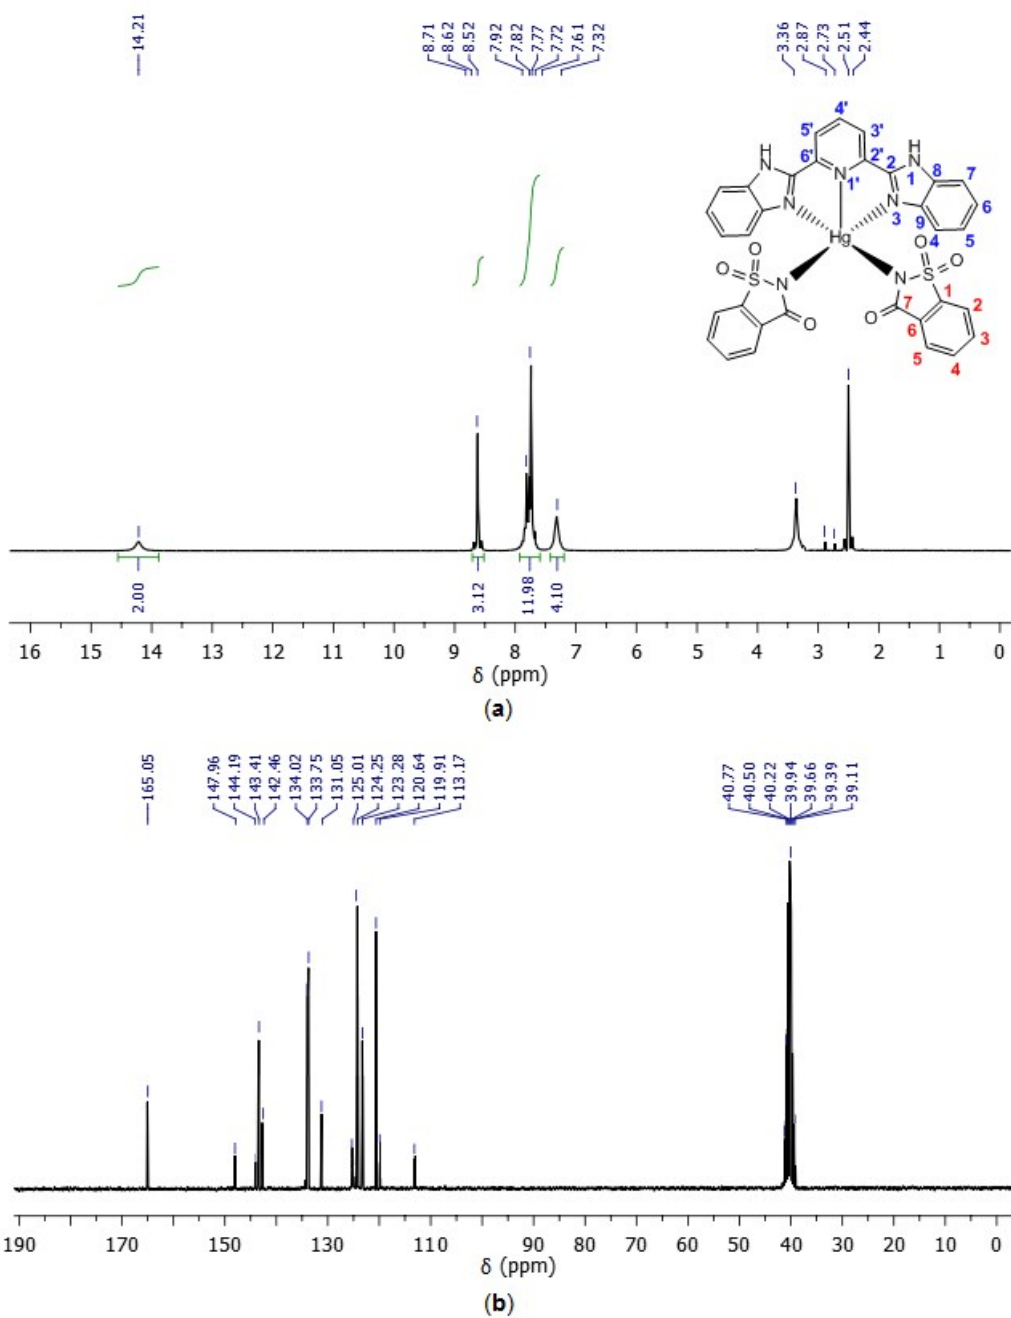

**Fig. S3c**  $^1\text{H}$ - (a) and  $^{13}\text{C}$ - (b) spectra of **Hg**.

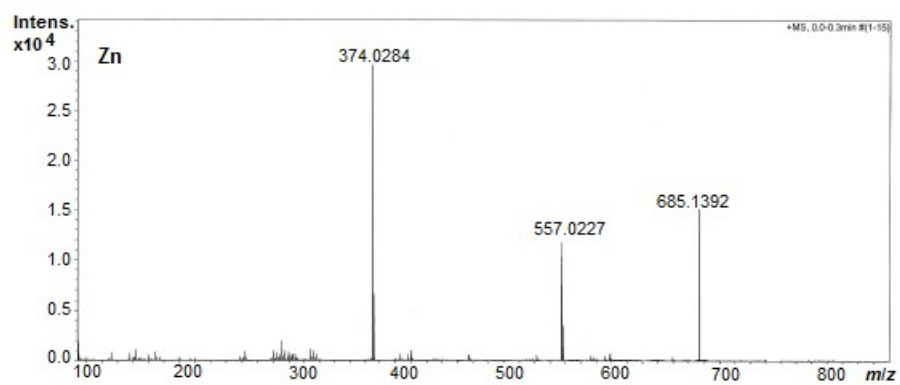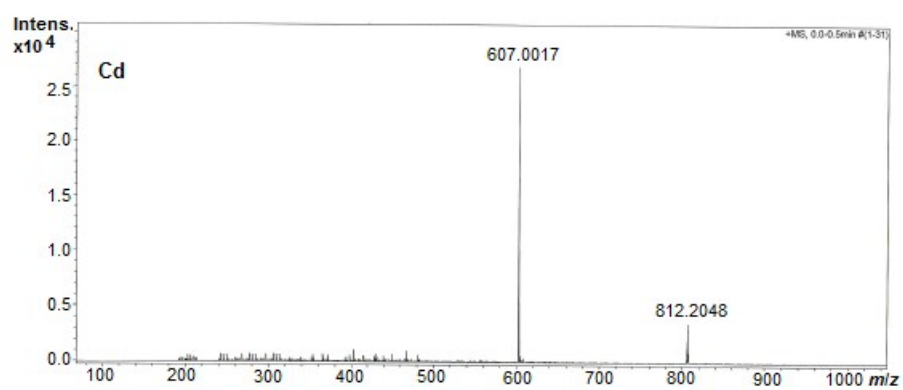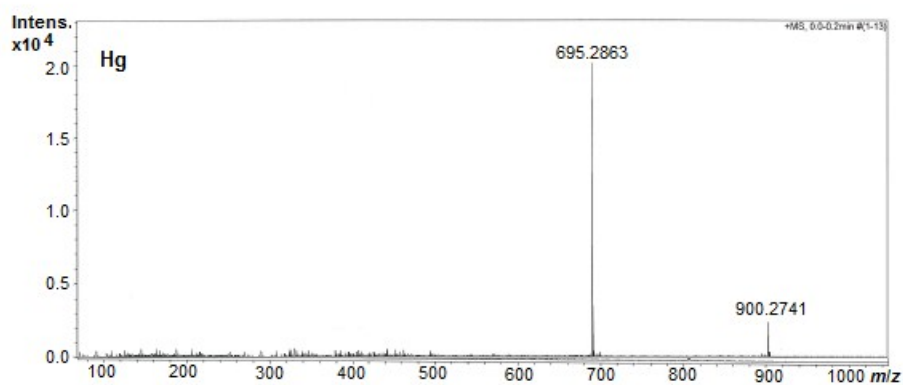

**Fig. S4** ESI-MS spectra of the metal complexes.

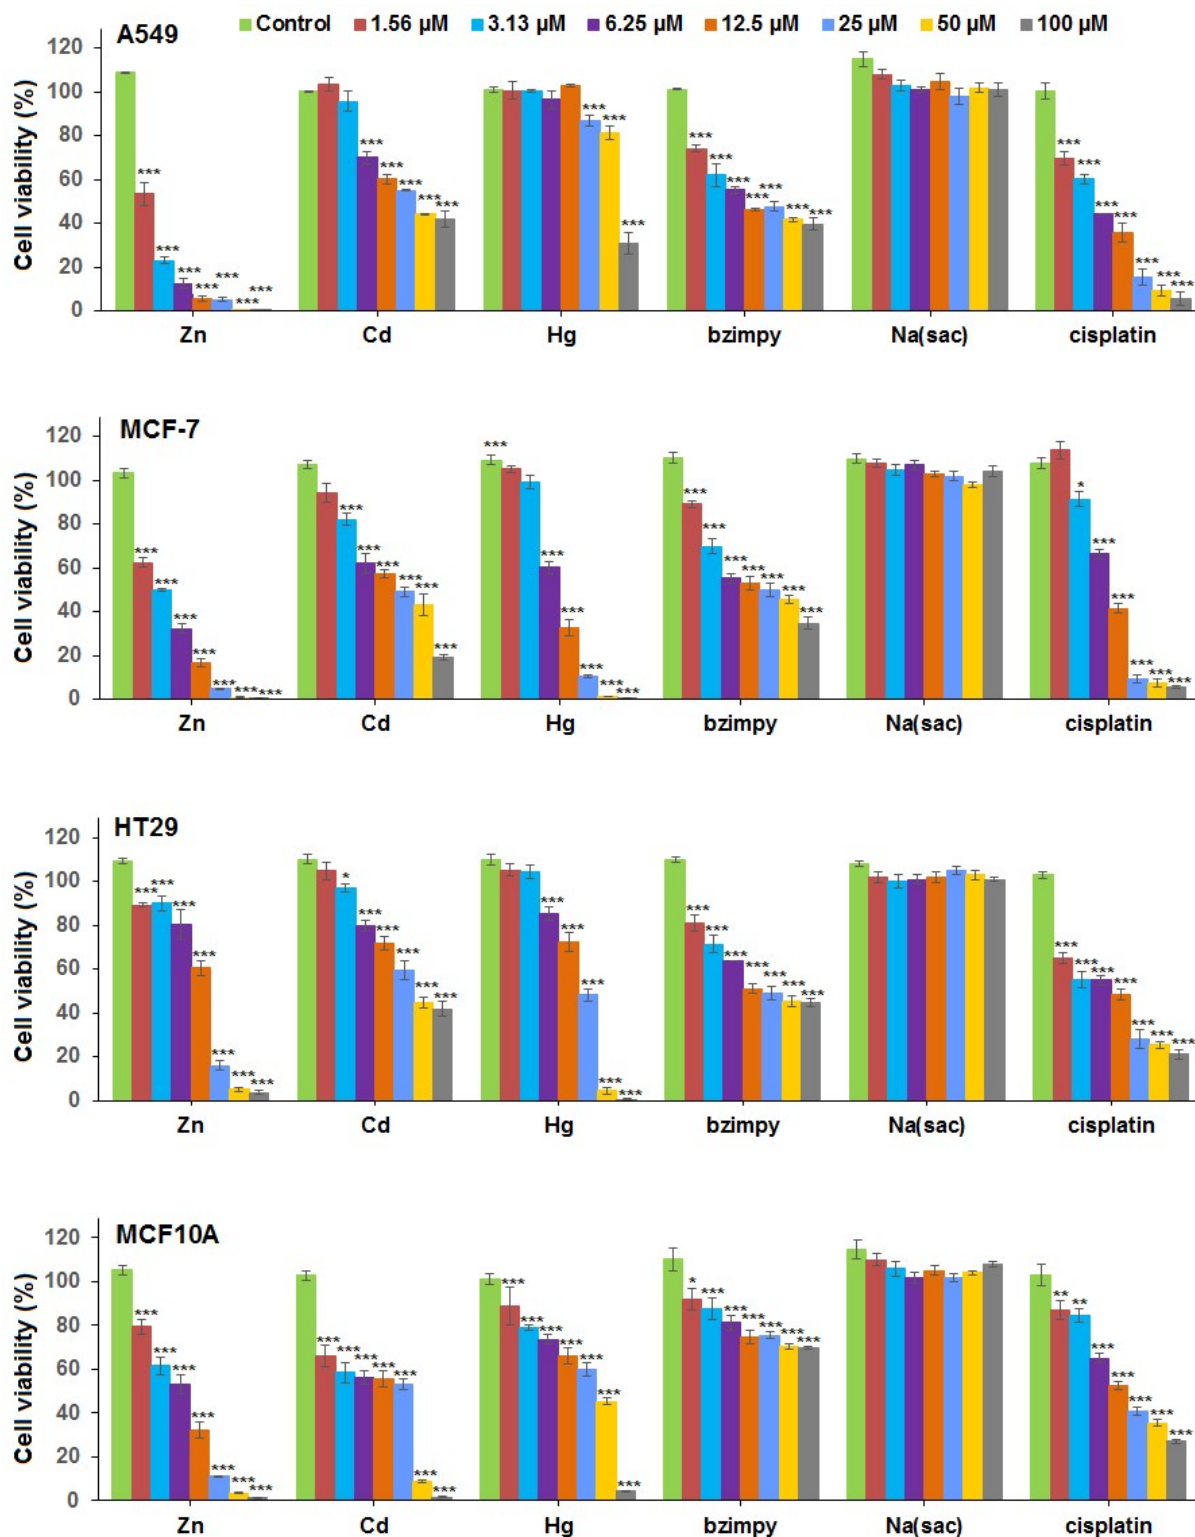

**Fig. S5** The dose-response graphics for the metal complexes, bzimpy, Na(sac) and cisplatin obtained from ATP assay, showing the effect of the complexes on the growth of the cell lines after 48 h of treatment. Results are represented as mean  $\pm$  standard deviation ( $n = 3$ ). The asterisks denote statistically significant differences in comparison with the control group ( $*p < 0.05$ ,  $**p < 0.01$  and  $***p < 0.001$ ).

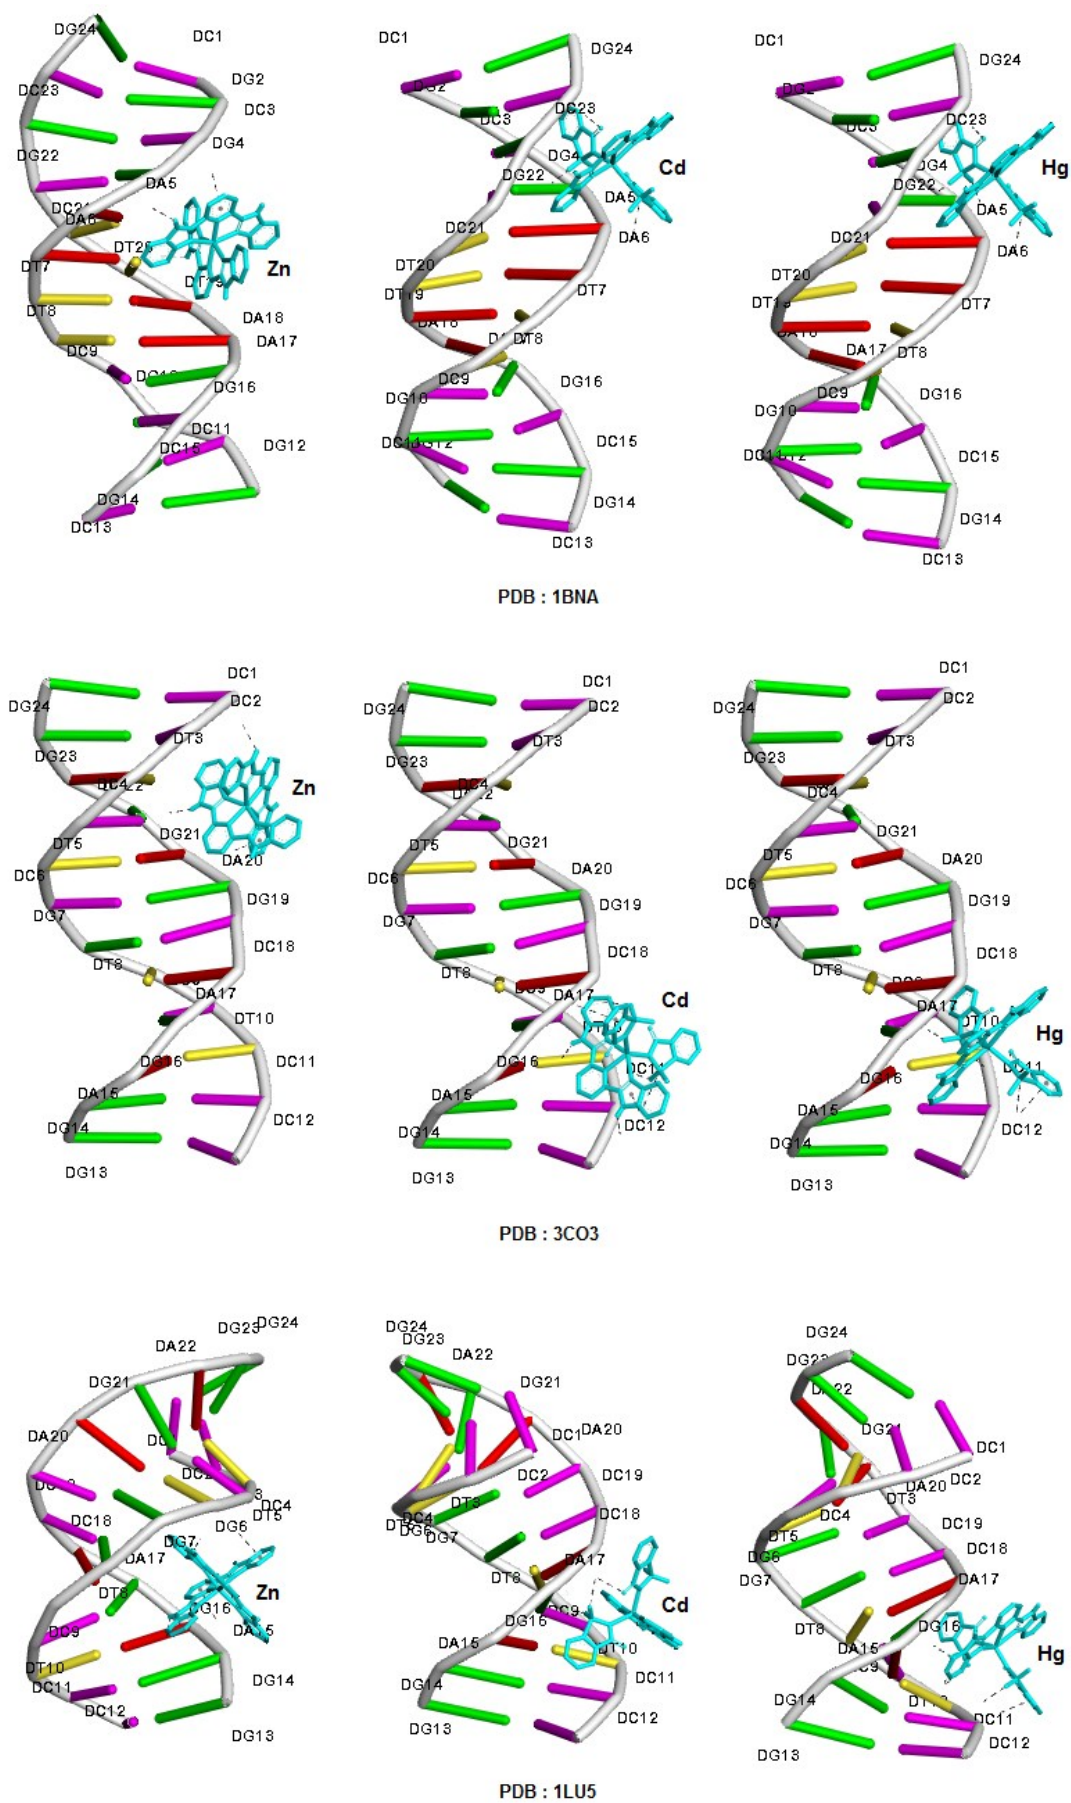

**Fig. S6** DNA docking models of the metal complexes with 1BNA, 3CO3 and 1LU5.

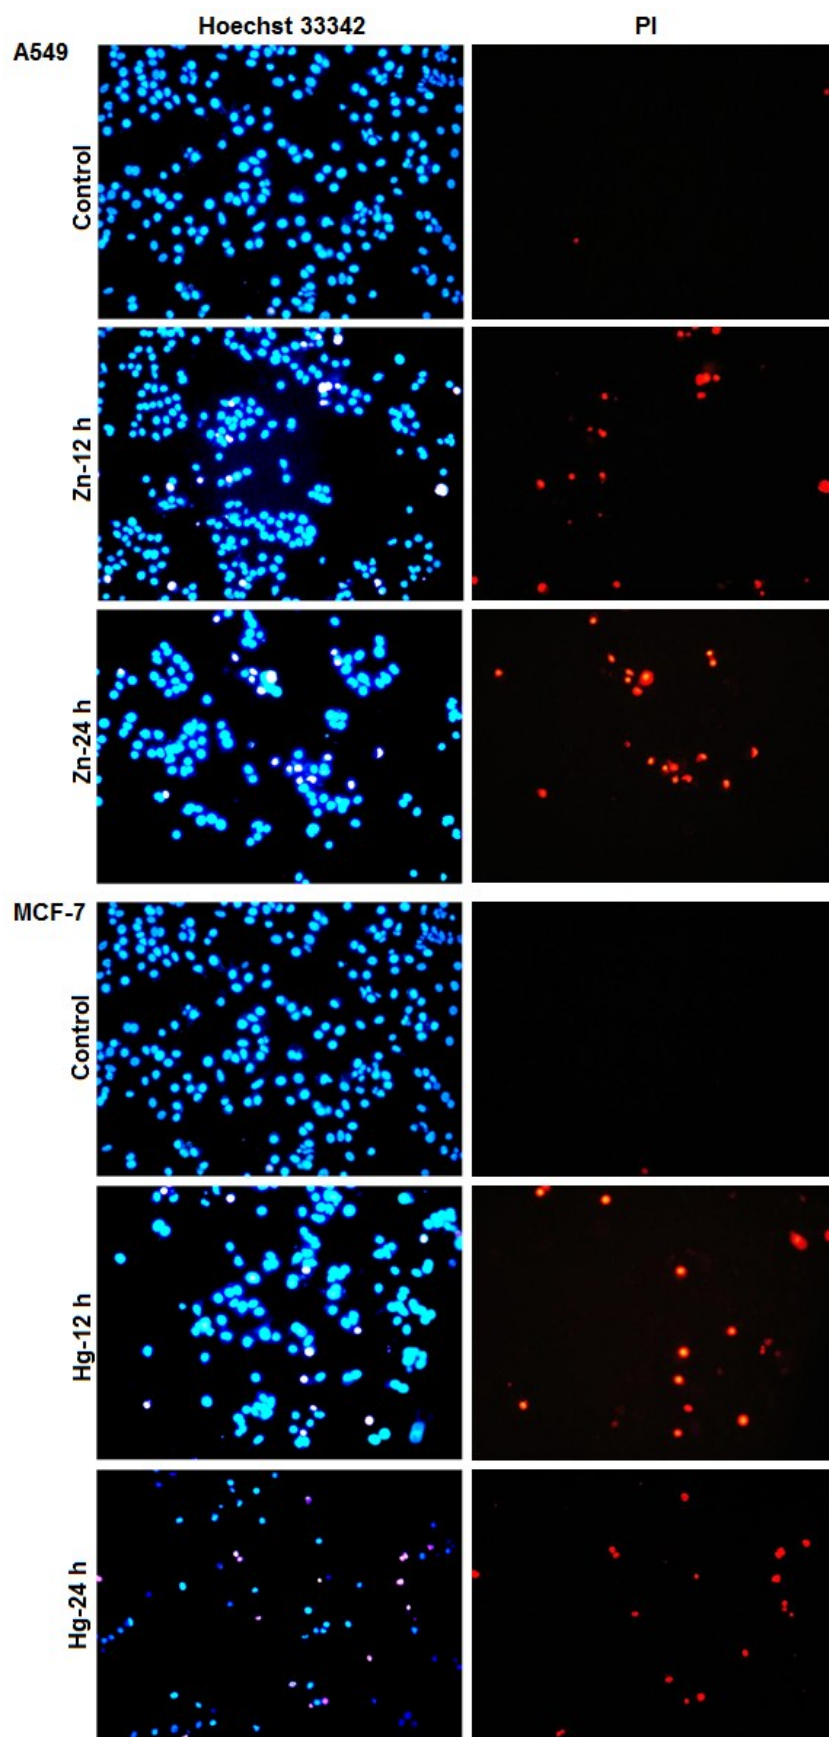

**Fig. S7** Morphological changes in the nuclei of A549 and MCF-7 cells treated with  $IC_{90}$  doses of **Zn** and **Hg**, respectively, for 12 and 24 h. Cells were stained with Hoechst 33342/PI followed by detection using a fluorescence microscope. Magnification: 20 $\times$ .



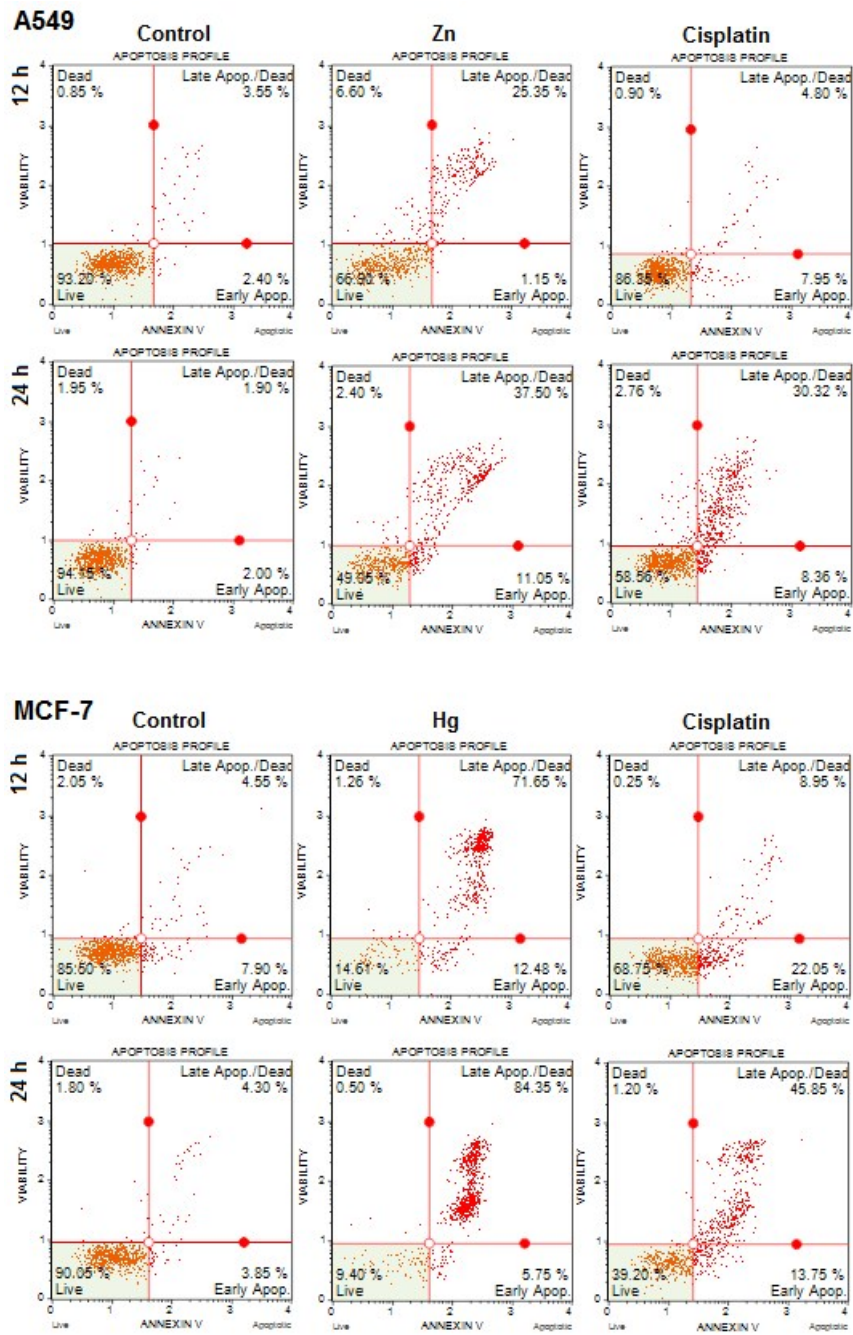

**Fig. S8** Annexin-V/7-AAD staining assay. A549 and MCF-7 cells treated with IC<sub>90</sub> doses of **Zn** and **Hg**, respectively, for 12 and 24 h. Cisplatin Zn was used as a positive control.

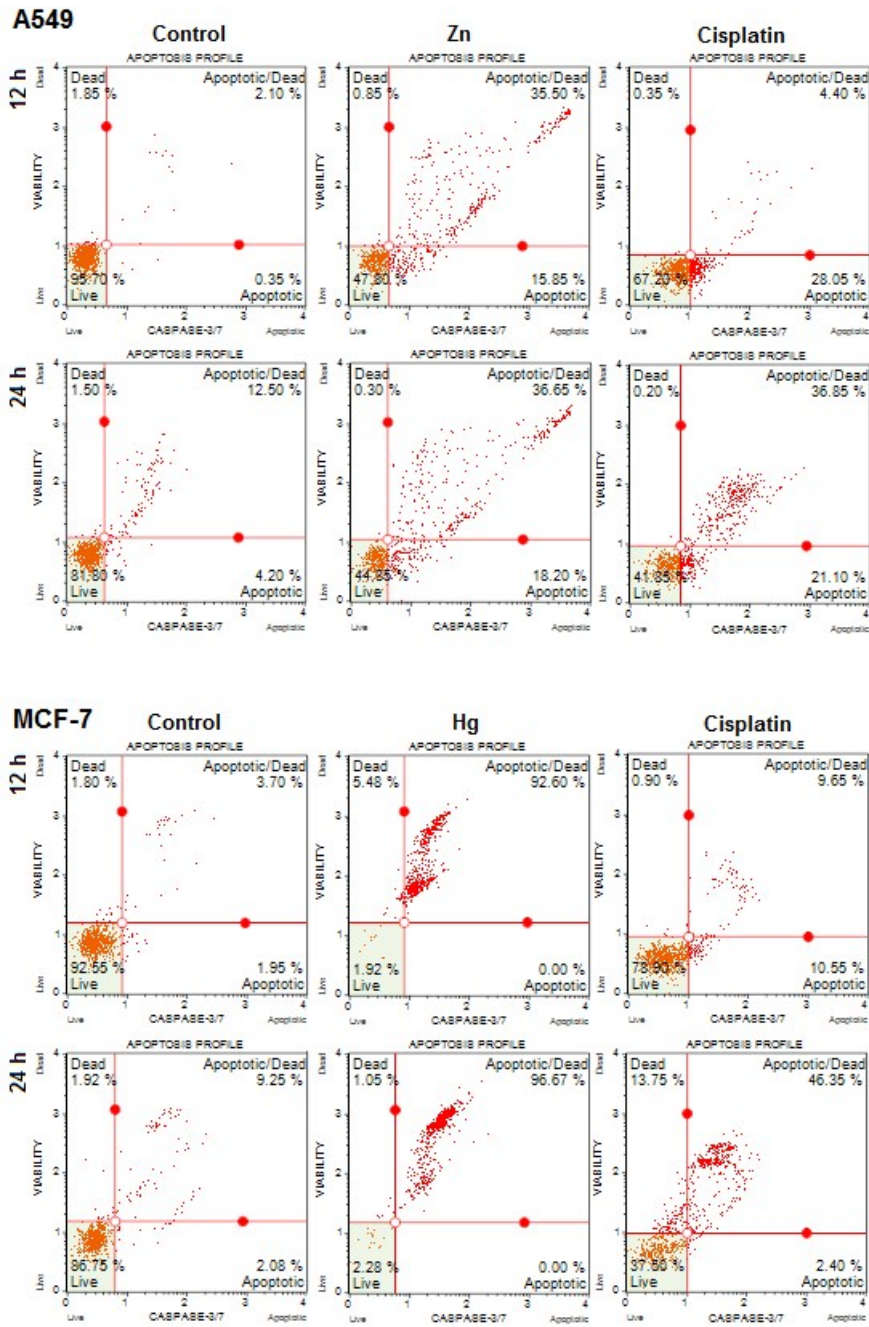

**Fig. S9** Caspase 3/7 activity in A549 and MCF-7 cells treated with IC<sub>90</sub> doses of Zn and Hg, respectively, for 12 and 24 h. Cisplatin was used as a positive control.

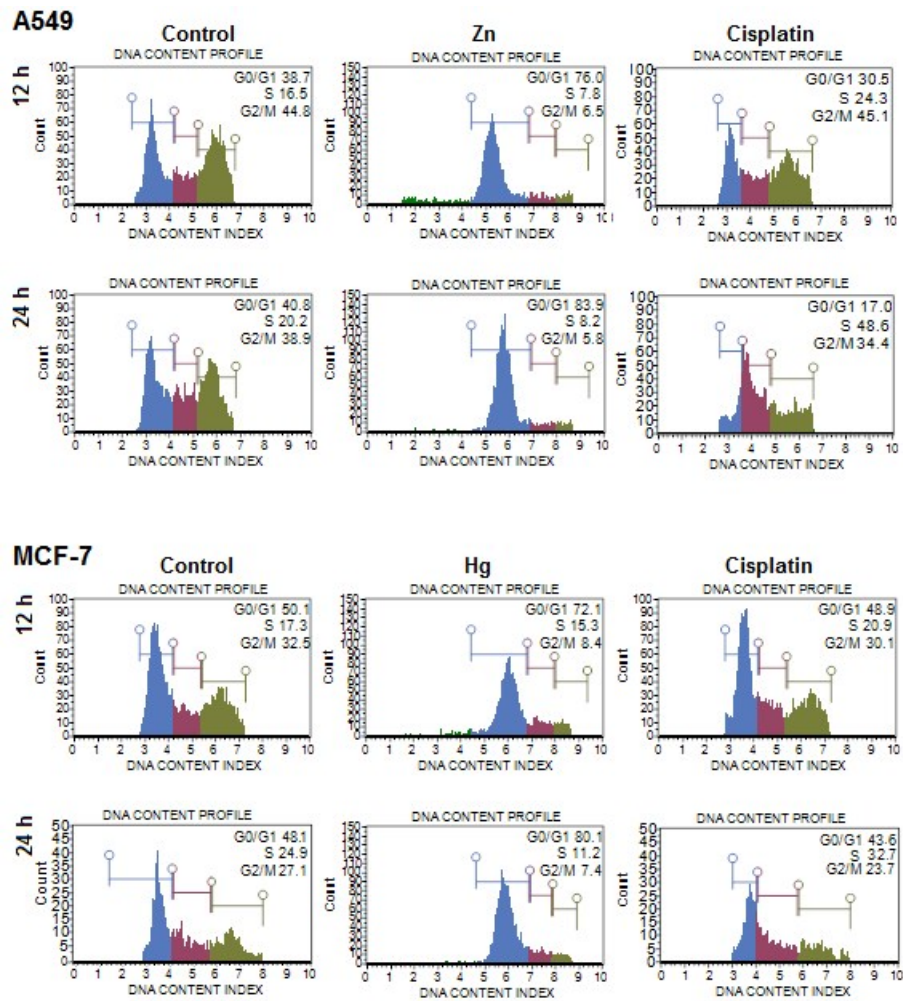

**Fig. S10** Cell cycle progression of A549 and MCF-7 cells treated with IC<sub>90</sub> doses of Zn and Hg, respectively, for 12 and 24 h. Cisplatin was used as a positive control.



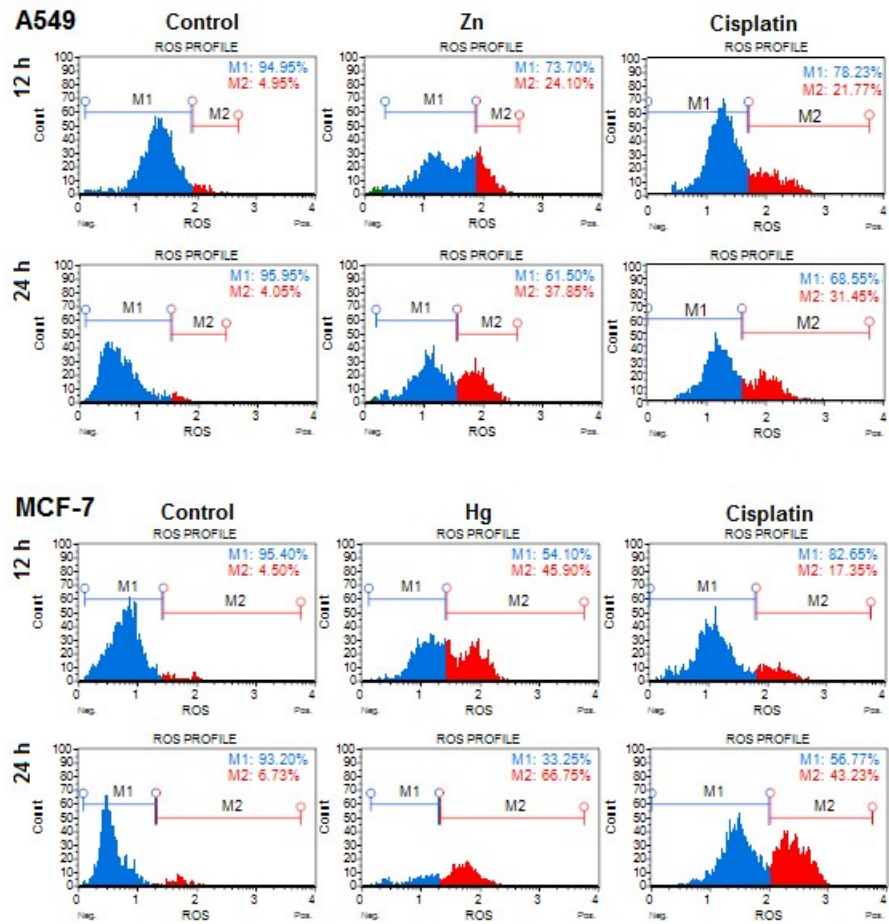

**Fig. S11** ROS generation in A549 and MCF-7 cells treated with IC<sub>90</sub> doses of **Zn** and **Hg**, respectively, for 12 and 24 h. Cisplatin was used as a positive control.

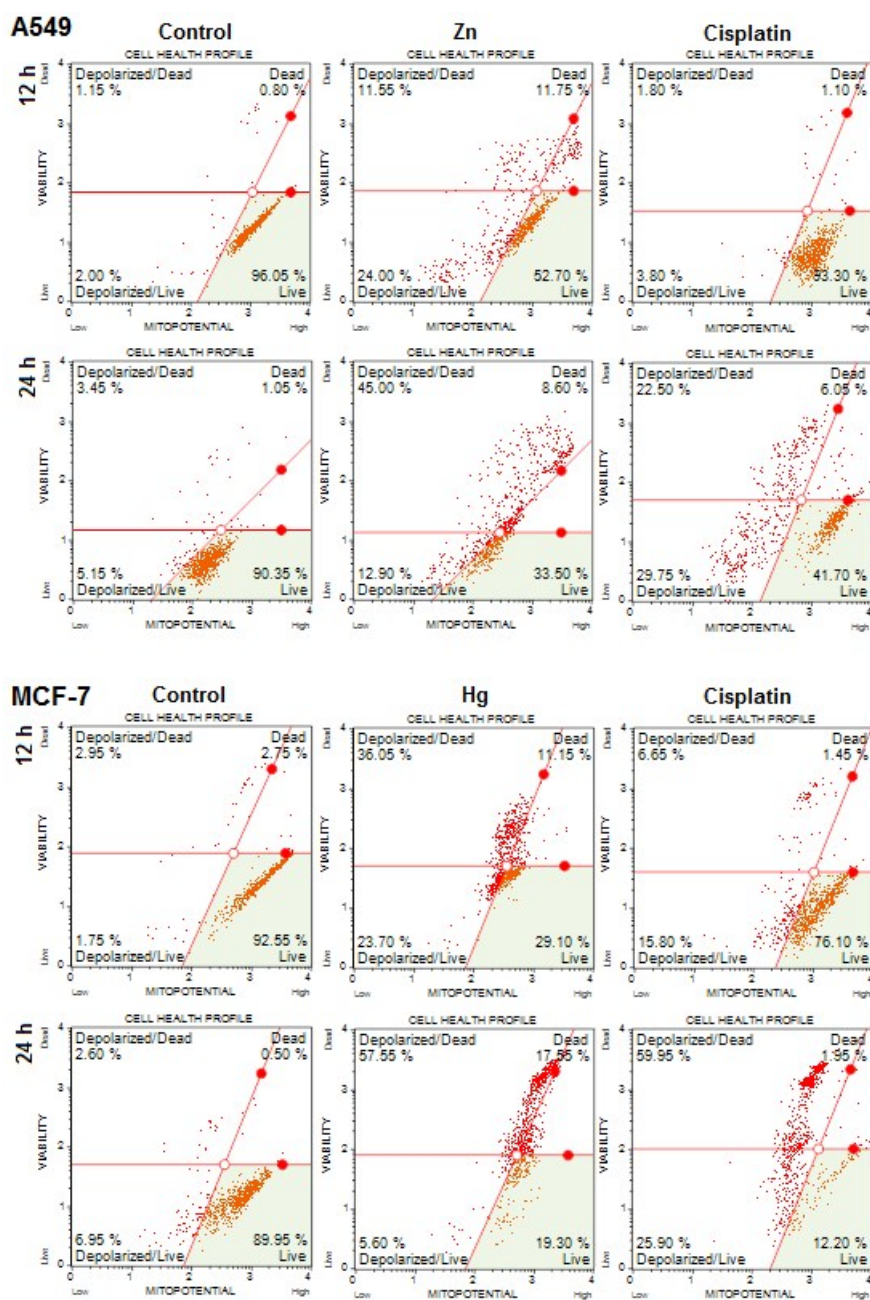

**Fig. S12** Mitochondrial membrane depolarization in A549 and MCF-7 cells treated with IC<sub>90</sub> doses of Zn and Hg, respectively, for 12 and 24 h. Cisplatin was used as a positive control.

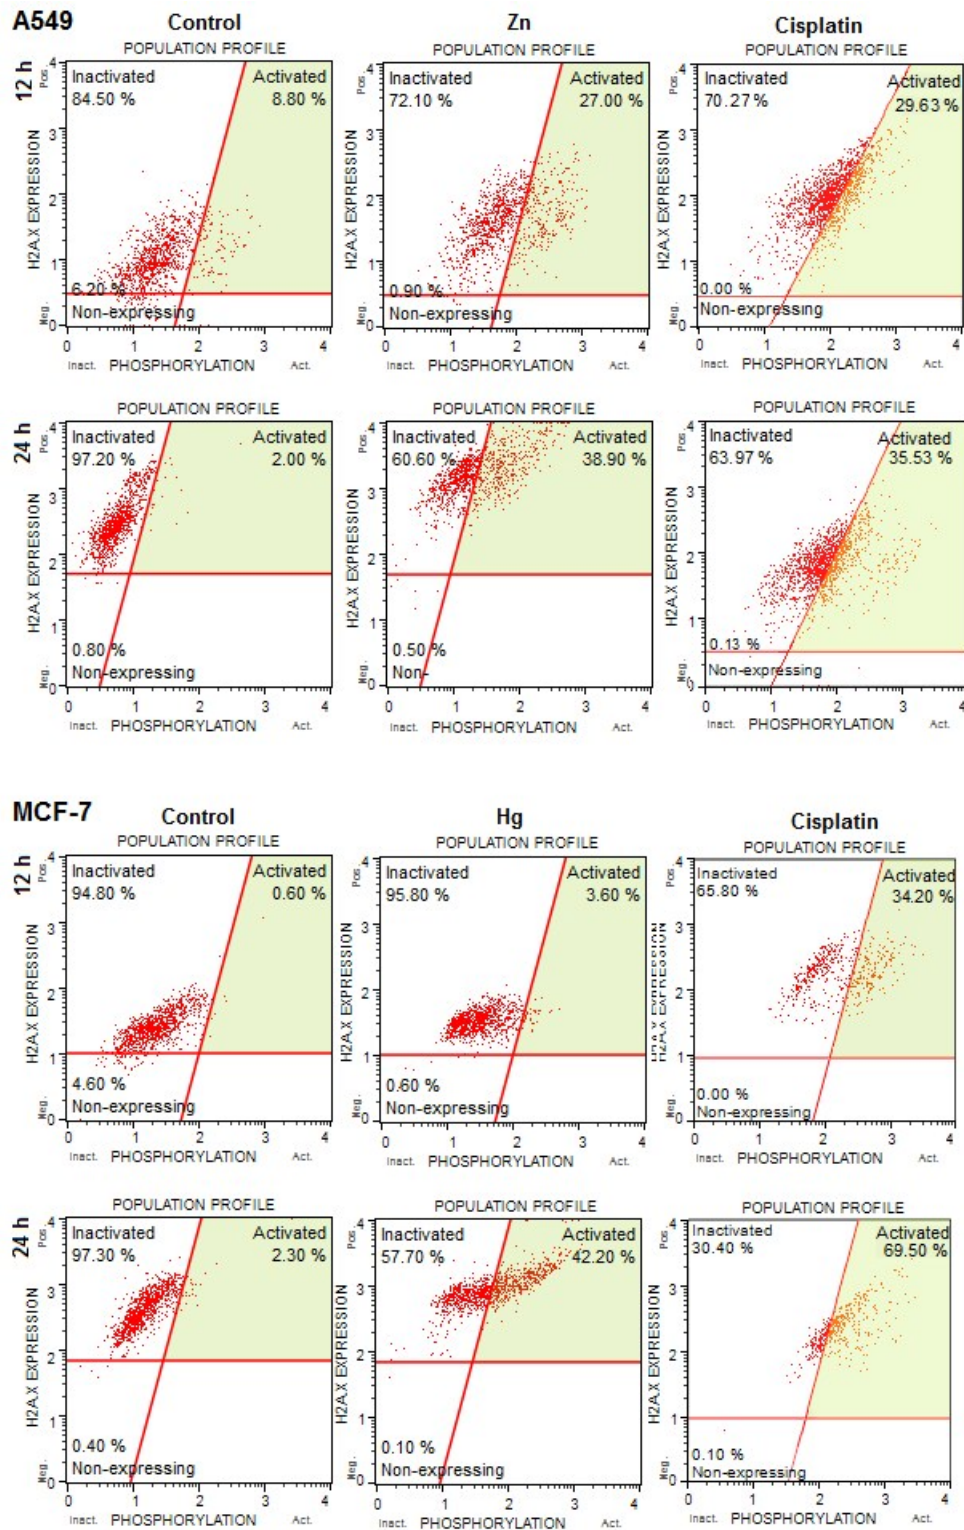

**Fig. S13** Formation of DNA double-strand breaks in A549 and MCF-7 cells treated with  $IC_{90}$  doses of Zn and Hg, respectively, for 12 and 24 h. Cisplatin was used as a positive control.
